# Supplementary material for: Enzyme-mimicking redox-active vitamin B12 functionalized MWCNT catalyst for nearly 100% faradaic efficiency in electrochemical CO 2 reduction
Source: Royal Society of Chemistry journal article supplement (doi:10.1039/d4ta04145c), 2024-01-01
Supplement: d4ta04145c1.pdf [file d4ta04145c1.pdf]

## **Supporting Information**

# **Enzyme-Mimicking Redox-Active Vitamin B12 Functionalized MWCNT-Catalyst for Nearly 100% Faradaic Efficiency in Electrochemical CO<sub>2</sub> Reduction**

Yashly Yesudas K,<sup>a,b</sup> Mani Balamurugan,<sup>c</sup> Ki Tae Nam,<sup>c</sup> Buvaneswari Gopal,<sup>b\*</sup> Annamalai

Senthil Kumar<sup>a,b \*</sup>

*<sup>a</sup>Carbon Dioxide Research and Green Technology Centre, Vellore Institute of Technology  
University,  
Vellore 632 014, India*

*<sup>b</sup>Department of Chemistry, School of Advanced Sciences, Vellore Institute of Technology  
University, Vellore 632 014, India*

*<sup>c</sup>Department of Materials Science and Engineering, Seoul National University, Seoul 151-  
742, Korea.*

*\*Corresponding Author's email addresses: [askumar@vit.ac.in](mailto:askumar@vit.ac.in) & [askumarchem@yahoo.com](mailto:askumarchem@yahoo.com)*

## 1. Calculation for the Turnover Number and Turnover Frequency

### 1.1. Turnover Number (TON)

The Turnover Number (TON) is a measure of the catalytic efficiency of the MWCNT@B12 surface. It is calculated as the ratio of the number of moles of CO formed to the number of moles of active B12 catalyst.

$$\text{TON} = (\text{Number of moles of CO formed})/(\text{Number of moles of active B12})$$

Given values:

- CO concentration: 36.02  $\mu\text{mol}$  (obtained by bulk electrolysis experiment at an optimal potential, -1.35 V vs Ag/AgCl (-0.727 V vs RHE) and product measured by GC technique, where nearly 100% Faradaic efficiency (FE) for CO<sub>2</sub> conversion to CO is achieved. Total time of electrolysis = 1800s)

- Active B12 concentration: 7.91 nmol (Derived from the charge of the CV redox-peak of the CP/MWCNT@B12)

Calculation for the TON:

$$\text{TON} = (36.02 \times 10^{-6} \text{ mol})/(7.91 \times 10^{-9} \text{ mol}) = 4559$$

### 1.2. Turnover Frequency (TOF)

The Turnover Frequency (TOF) is a measure of the rate of CO<sub>2</sub>-to-CO conversion. It is calculated as the ratio of the TON to the reaction time.

$$\text{TOF} = \text{TON}/\text{time} (\text{s}^{-1})$$

Given values:

- TON: 4559

- Electrolysis time: 1800s

Calculation:

$$\text{TOF} = 4559/1800 \text{ s} = 2.5 \text{ s}^{-1}$$

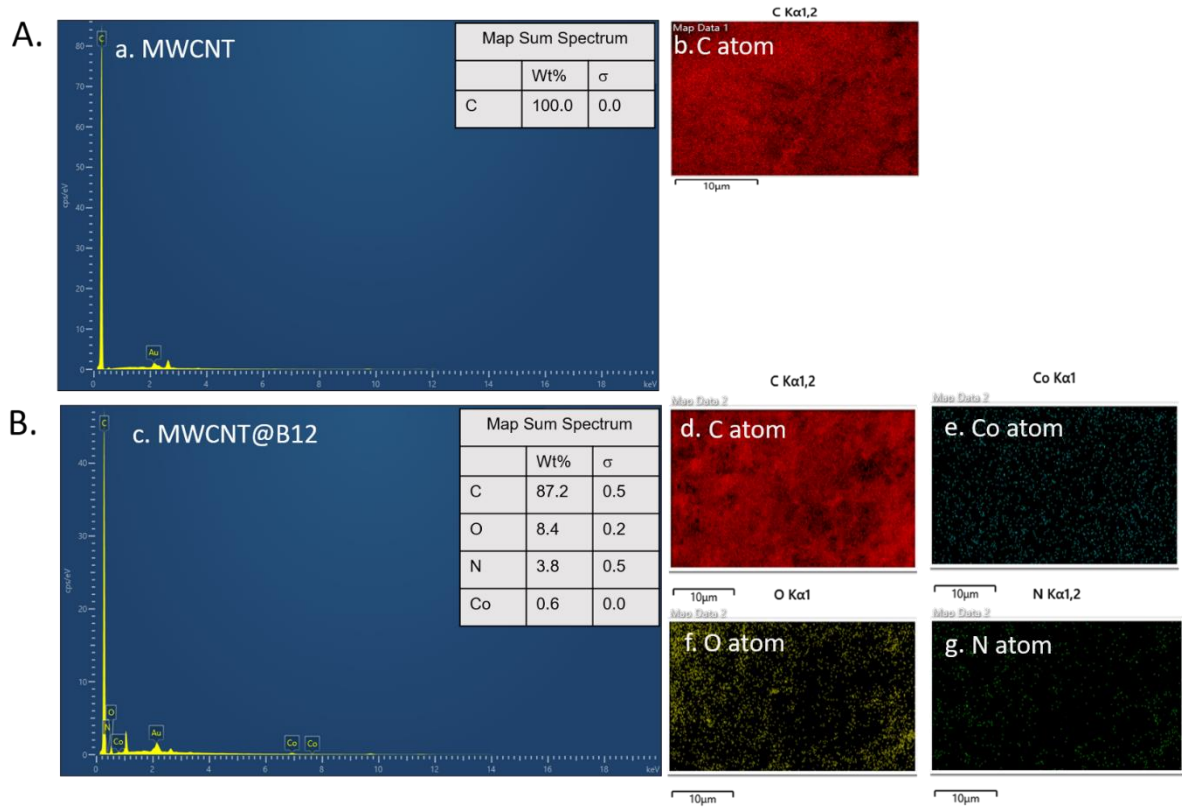

**Figure S1. EDAX spectrum and corresponding elemental mapping of (A) MWCNT (a) and (B) MWCNT@B12(c). Elemental mapping of Carbon from MWCNT (b), and Carbon (d), Cobalt (e), Oxygen (f) and Nitrogen (g) from MWCNT@B12.**

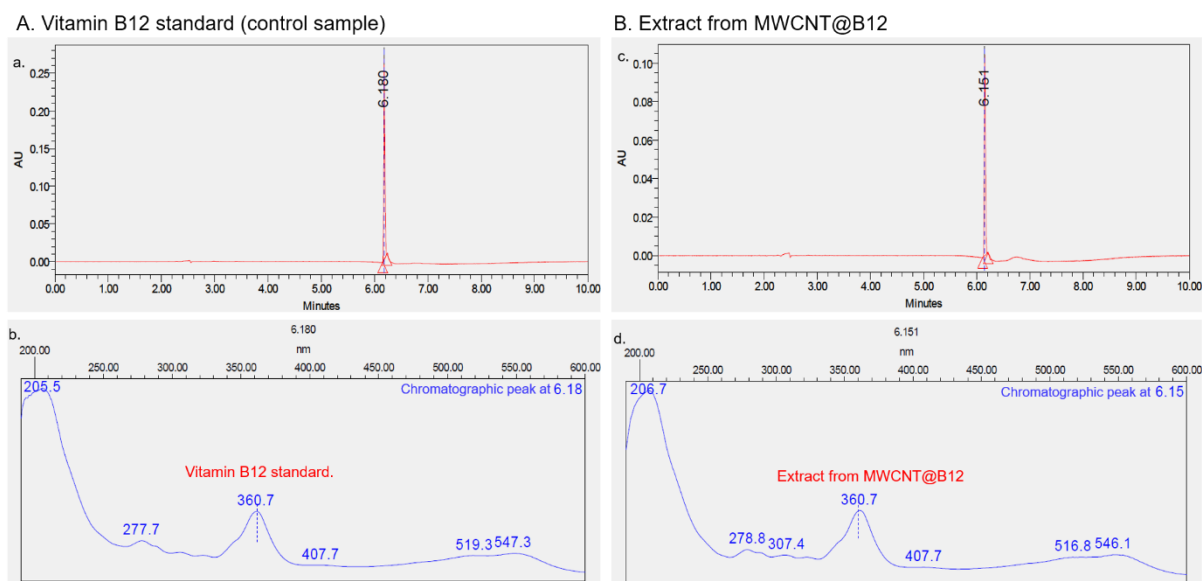

**Figure S2. Confirmation for the Vitamin B12.** UPLC chromatogram (a and c) and corresponding UV spectrum (b and d) of (A) Standard Vitamin B12 and (B) Aqueous extract of MWCNT@B12. Mobile phase, acetonitrile+(water+formic acid (0.025%)) under gradient condition.

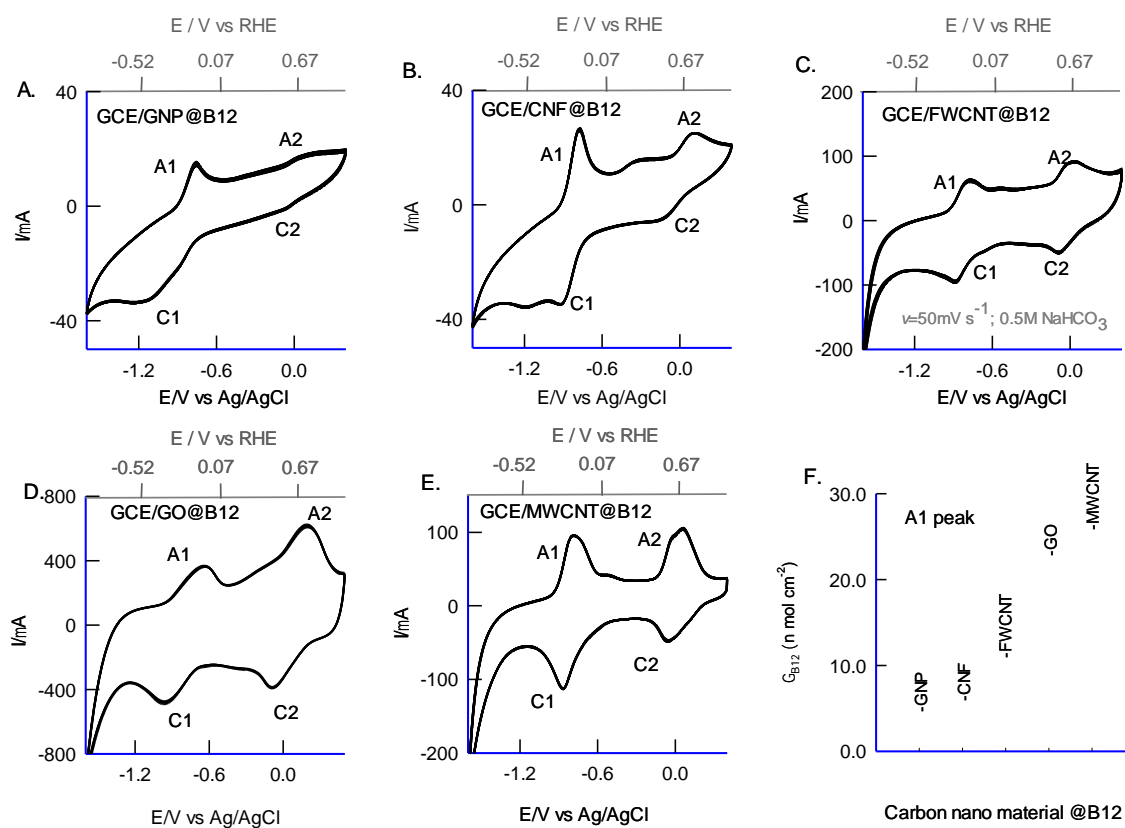

**Figure S3.** Comparative CV responses of B12 immobilized on various carbon nanomaterials modified GCE surfaces in 0.5 M NaHCO<sub>3</sub> solution (N<sub>2</sub>= purged) at the scan rate of 50 mV s<sup>-1</sup>. GNP = graphite nanopowder; CNF = Carbon Nanofiber; FWCNT = carboxylic acid functionalized multiwalled carbon nanotube; GO = Graphene oxide; MWCNT = multiwalled carbon Nanotube.

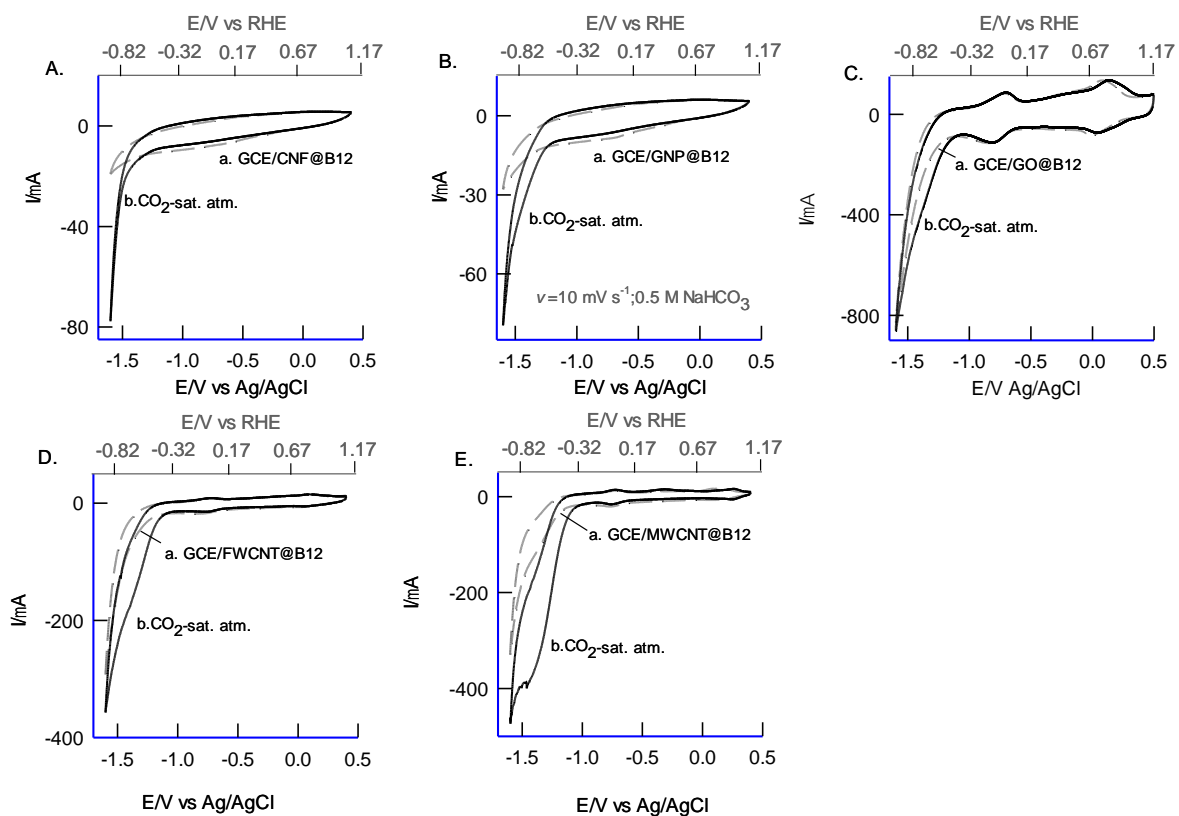

**Figure S4.** CV response of modified electrode in  $N_2$  saturated atm (curve a) and in  $CO_2$  saturated (curve b) in  $0.5 \text{ M NaHCO}_3$  solution at  $v = 10 \text{ mV s}^{-1}$ . (A) GCE/CNF@B12 (B) GCE/GNP@B12 (C) GCE/GO@B12 (D) GCE/FMWCNT@B12 (E) GCE/MWCNT@B12.

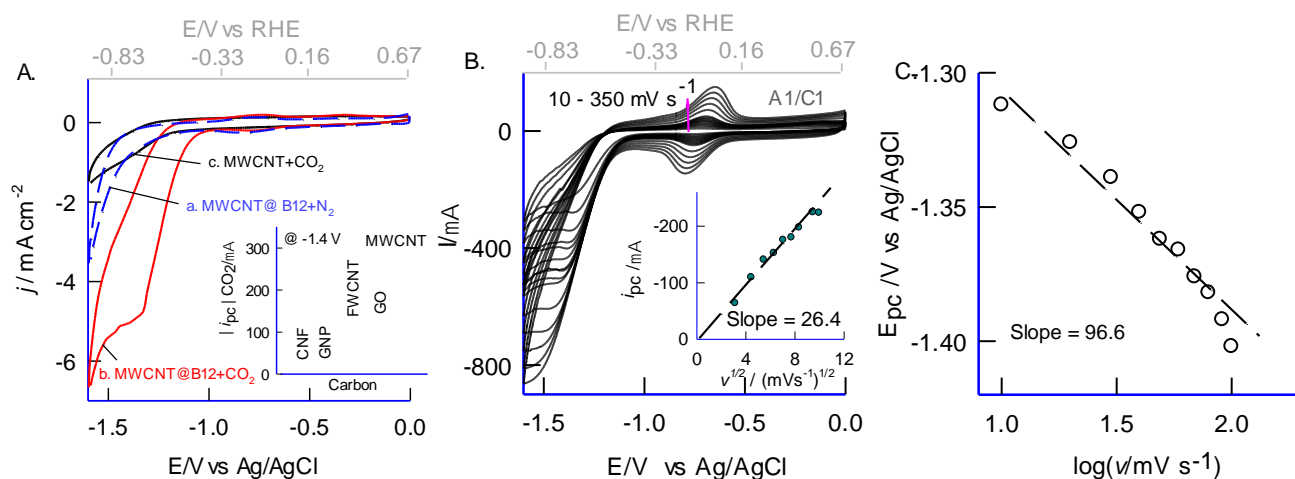

**Figure S5.** Comparative CV responses GCE/MWCNT@B12 with  $\text{N}_2$  (a) and  $\text{CO}_2$  (b) saturated  $0.5$  M  $\text{NaHCO}_3$  at a scan rate of  $10$   $\text{mV s}^{-1}$ . Curve c is a control CV of GCE/MWCNT with  $\text{CO}_2$  saturated solution. Inset is a plot of  $|i_{pc}|$   $\text{CO}_2$  ( $\mu\text{A}$ ) versus B12 modified carbon electrodes; GCE/CNF@B12; GCE/GNP@ B12; GCE/FWCNT@B12; GCE/GO@B12; GCE/MWCNT@B12. (B) Effect of scan rate on CV response of GCE/MWCNT@B12 in saturated  $\text{CO}_2$  in  $0.5$  M  $\text{NaHCO}_3$ . Inset is a plot of  $i_{pc}$  vs square root of scan rate ( $v$ ) $^{1/2}$ . (C) Plot of  $E_{pc}$  vs log of scan rate ( $v$ )

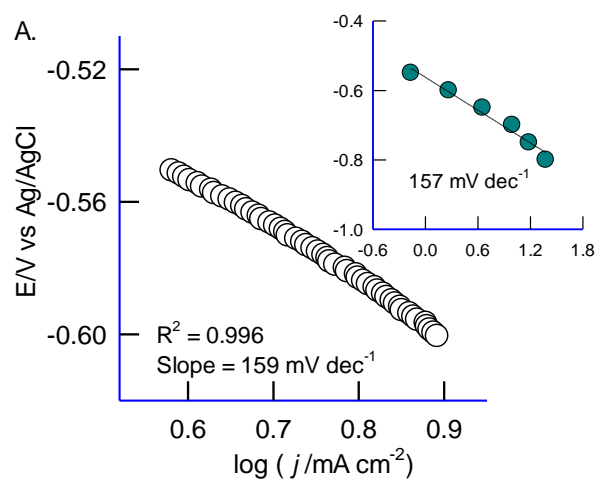

**Figure S6.** (A) Tafel plot for the CV data of electrochemical reduction of  $CO_2$  on CP/MWCNT@B12 at  $\nu = 10\ mV\ s^{-1}$  corresponding to the Figure 3A. Inset is the Tafel plot corresponding to the potentiometric polarization experimental's current density data as given in the Figure 3B.



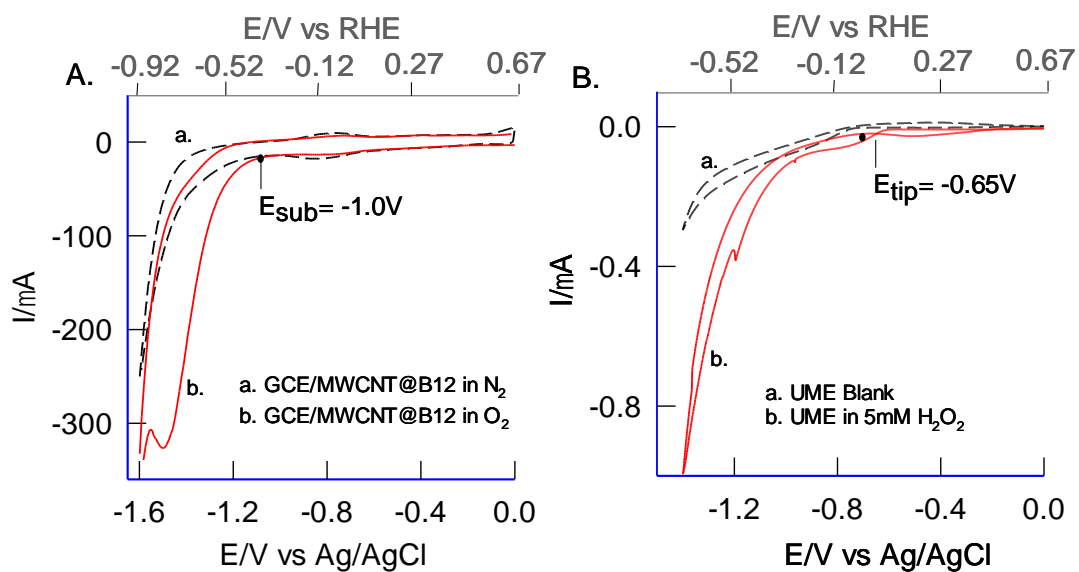

**Figure S7.** (A) CV response of GCE/MWCNT@B12 in  $N_2$  saturated (curve a) and in  $O_2$  saturated (curve b) atmosphere in 0.5 M  $NaHCO_3$  solution at  $\nu = 10 \text{ mV s}^{-1}$ . (B) CV response of platinum UME without (a) and with 5 mM  $H_2O_2$  (b) in 0.5 M  $NaHCO_3$  (curve b) at  $\nu = 10 \text{ mV s}^{-1}$

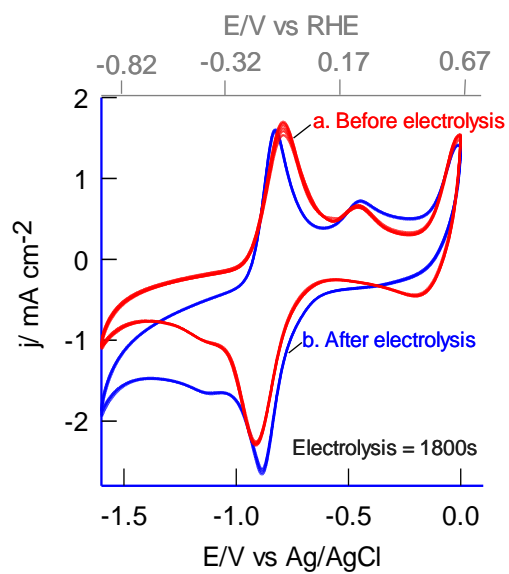

**Figure S8. Stability of the modified electrode.** Comparative CV responses of CP/MWCNT@B12 before (curve a) and after electrolysis (curve b) of saturated  $\text{CO}_2$  in 0.5 M  $\text{NaHCO}_3$  at  $\nu = 50 \text{ mV s}^{-1}$ .
